# Supplementary material
Source: HighWire-hosted journal article supplement (https://diabetes.diabetesjournals.org/content/suppl/2005/11/28/54.12.3442)
Supplement: pg3442OnlineAppendix.pdf [file pg3442OnlineAppendix.pdf]

Supplemental data

*Primers and Probes*

| Gene             | Forward 5'-3'                       | Revers 5'-3'                         | Probe 5'-3'                                |
|------------------|-------------------------------------|--------------------------------------|--------------------------------------------|
| mPPAR $\gamma_1$ | AgAAgCggTgA<br>ACCACTgATAT<br>TC    | AgAggTCCACA<br>gAgCTgATTCC           | AgAgATgCCAT<br>TCTggCCCACC<br>AAC XT       |
| mPPAR $\gamma_2$ | TgggTgAAACT<br>CTgggAgATTC          | gAgAggTCCAC<br>AgAgCTgATTCC<br>C     | CCCAGAgCATg<br>gTgCCTTCgCTg<br>T XT        |
| maP2             | TgggTgAAACT<br>CTgggAgATTC          | AATCCCCATT<br>TACgCTgATgA<br>TC      | TgCCACAAggA<br>AAgTggCAggC<br>A XT         |
| mPR              | CTgCCTCTCAT<br>gATCCgAgg            | gAA AAg gAT<br>gAA gAC CCA<br>ggg    |                                            |
| mEGR-1           | gAg CAC CTg<br>ACC ACA gAg<br>TCC   | Cgg CCA gTA<br>TAg gTg ATg gg        |                                            |
| mGyK             | CAACACgggCC<br>ATAAgTgTg            | TTA gCC AgC<br>ggA TTA CAg<br>CAC    |                                            |
| mCD36            | gAT TAA Tgg<br>CAC AgA CgC<br>AgC   | TCC gAA CAC<br>AgC gTA gAT<br>AgA CC |                                            |
| mFBI-1           | AAg gTg ATT<br>CAg ggT gCC g        | TgT CCT gTC<br>Tgg TgA ATC<br>gAA C  |                                            |
| m18s             | ACC Tgg TTg<br>ATC CTg CCA<br>gTA g | TTA ATg AgC<br>CAT TCg CAg<br>TTT C  | TgC ATg TCT<br>AAg TAC gCA<br>Cgg CCg T XT |
| mCEBP/ $\alpha$  | Tgg gCg gAT<br>CTg CgA g            | TCg gCT gTg<br>CTg gAA gAg g         |                                            |
